## Is sedentary lifestyle a critical driver for hypertension burden in Sub-Saharan Africa?: evidence from a community-based population in Ghana and Nigeria

Okekunle A.<sup>1</sup>; Akpa O.<sup>2</sup>; Akinyemi R.<sup>3</sup>; Sarfo F.<sup>4</sup>; Ogbale G.<sup>5</sup>; Akpalu A.<sup>6</sup>; Wahab K.<sup>7</sup>; Obiako R.<sup>8</sup>; Komolafe M.<sup>9</sup>; Fawale B.<sup>9</sup>; Owolabi L.<sup>10</sup>; Ovbiagele B.<sup>11</sup>; Owolabi M.<sup>12</sup>

<sup>1</sup>College Of Medicine, University Of Ibadan, H3 Africa Cardiovascular Diseases Project, Department of Medicine, Ibadan, Nigeria

<sup>2</sup>College Of Medicine, University Of Ibadan, Department of Epidemiology and Medical Statistics, Ibadan, Nigeria

<sup>3</sup>College Of Medicine, University Of Ibadan, Center for Genomic and Precision Medicine, Ibadan, Nigeria

<sup>4</sup>Kwame Nkrumah University of Science and Technology, Department of Medicine, Kumasi, Ghana

<sup>5</sup>College Of Medicine, University Of Ibadan, Ibadan, Nigeria

<sup>6</sup>University of Ghana Medical School, Department of Community Health, Accra, Ghana

<sup>7</sup>University of Ilorin Teaching Hospital, Department of Medicine, Ilorin, Nigeria

<sup>8</sup>Ahmadu Bello University Teaching Hospital, Department of Medicine, Zaria, Nigeria

<sup>9</sup>Obafemi Awolowo University Teaching Hospital, Department of Medicine, Ife, Nigeria

<sup>10</sup>Aminu Kano Teaching Hospital, Department of Medicine, Kano, Nigeria

<sup>11</sup>University of California San Francisco, San Francisco, United States of America

<sup>12</sup>College Of Medicine, University Of Ibadan, Department of Medicine, Ibadan, Nigeria

**Funding Acknowledgements:** Type of funding sources: Public Institution(s). Main funding source(s): National Institute of Health (NIH)

**OnBehalf:** SIREN as part of the H3 Africa Consortium

**Background:** Hypertension is the principal risk factor for stroke events in Sub-Saharan Africa (SSA). However, international evidence on the significance of physical inactivity as a critical driver of hypertension risk in SSA is sparse.

**Purpose:** This study assessed determinants of hypertension risk among a stroke-free population in Ghana and Nigeria.

**Methods:** Participants were 4,267 stroke-free individuals recruited in the Stroke Investigative Research and Education Network study from Nigeria and Ghana. Data on sociodemographic, lifestyle, cardiovascular risk and blood pressure were collected using standard protocols. Hypertension was defined as systolic blood pressure (SBP)  $\geq 140$ mmHg or diastolic blood pressure (DBP)  $\geq 90$ mmHg or a previous diagnosis or current use of antihypertensive medications. Odds ratio (OR) and 95% confidence interval (CI) for hypertension risk was estimated using logistic regression at  $P < 0.05$ .

**Results:** Mean age was  $55.9 \pm 14.7$  and 1.8% were physically inactive. Mean SBP and DBP were  $135.8 \pm 24.2$ mmHg and  $82.7 \pm 14.3$ mmHg respectively, and 56.7% had hypertension. Factors associated with hypertension were physical inactivity (OR: 9.09; 95%CI: 4.03, 20.53), being diabetic (OR: 2.70; 95%CI: 1.91, 3.82), being older than 60years (OR: 2.22; 95%CI: 1.78, 2.77) and family history of cardiovascular diseases (OR: 2.02; 95%CI: 1.59, 2.56) and elevated waist circumference (OR: 1.01; 95%CI: 1.00, 1.02).

**Conclusion(s):** Physical inactivity was the leading risk factor for hypertension in this population. Community-oriented interventions promoting physical activity should help in the control of hypertension among sub-Saharan African population.
